# Supplementary material for: A self-healing and recyclable polyurethane-urea Diels–Alder adduct synthesized from carbon dioxide and furfuryl amine
Source: Royal Society of Chemistry journal article supplement (doi:10.1039/d0gc03695a), 2020-11-28
Supplement: d0gc03695a1.pdf [file d0gc03695a1.pdf]

## Supporting Information

### **A self-healing and recyclable polyurethane-urea Diels-Alder adduct synthesized from carbon dioxide and furfuryl amine**

*Peixuan Wu,<sup>a,b,c</sup> Haiyang Cheng,<sup>\*a,c</sup> Xinchao Wang,<sup>a,b,c</sup> Ruhui Shi,<sup>a,b,c</sup> Chao Zhang,<sup>a,c</sup>  
Masahiko Arai,<sup>a,c</sup> and Fengyu Zhao<sup>\*a,b,c</sup>*

<sup>a</sup> State Key Laboratory of Electroanalytical Chemistry, Changchun Institute of Applied Chemistry, Chinese Academy of Sciences, No. 5625 Renmin Rd., Changchun, 130022, China

E-mail: zhaofy@ciac.ac.cn; hycyl@ciac.ac.cn

<sup>b</sup> University of Science and Technology of China, No. 96 Jinzhai Rd., Hefei, 230026, China

<sup>c</sup> Jilin Province Key Laboratory of Green Chemistry and Process, Changchun Institute of Applied Chemistry, Chinese Academy of Sciences, No. 5625 Renmin Rd., Changchun, 130022, China

### Synthesis of diglycidyl furfuryl amine (DGFA)

Diglycidyl furfuryl amine was synthesized according to reported procedures.<sup>1</sup> The detailed experiment process was as follows: epichlorohydrin (40 g, 0.4324 mol) and tetrabutylammonium bromide 3.5 g were placed into a 500 mL round-bottom flask in an ice bath, and then furfuryl amine (20 g, 0.2062 mol) was slowly added dropwise while stirring. The reaction was continued for 12 h at room temperature. After the reaction, 60 mL of aqueous sodium hydroxide (40% w/w) was poured into the reaction mixture and it was stirred at room temperature for 4 h. Finally, the product was extracted with ethyl acetate (200 ml) and washed with water three times. The organic layer was collected, dried with magnesium sulfate, and ethyl acetate was removed using a rotary evaporator. The crude product so obtained was purified by distillation. The final product diglycidyl furfuryl amine (DGFA), a yellow liquid, was obtained with a total yield of 50% based on furfuryl amine.

<sup>1</sup>H NMR (400 MHz, Chloroform-d)  $\delta$  7.29 (d, J = 2.2 Hz, 1H), 6.24 (dd, J = 3.4, 1.8 Hz, 1H), 6.16 (d, J = 3.2 Hz, 1H), 3.88 (dd, J = 14.9, 2.4 Hz, 1H), 3.79 (s, 1H), 3.74 – 3.65 (m, 1H), 3.03 (dh, J = 6.6, 3.2 Hz, 2H), 2.96 (dd, J = 13.8, 3.0 Hz, 1H), 2.83 (dd, J = 14.0, 3.5 Hz, 1H), 2.69 (t, J = 4.6 Hz, 2H), 2.55 (dd, J = 13.9, 6.4 Hz, 1H), 2.44 (ddd, J = 8.0, 5.0, 2.7 Hz, 2H), 2.31 (dd, J = 13.9, 6.8 Hz, 1H).

### Synthesis of bis(cyclic carbonate) furfuryl amine (BCCFA)

Bis(cyclic carbonate) furfuryl amine was synthesized according to reported procedures.<sup>1</sup> The detailed experiment process was as follows: diglycidyl furfuryl amine (10.45 g, 0.05 mol), lithium bromide 0.217 g and DMF 30 mL were poured into a 50 mL stainless-steel autoclave and it was sealed and purged with N<sub>2</sub> three times to remove air. Then, the autoclave was heated to 100 °C and CO<sub>2</sub> was introduced up to 5 MPa. The reaction was run at a stirring speed of 800 rpm for 4 h. After the reaction was finished, the autoclave was cooled to ambient temperature and CO<sub>2</sub> was vented slowly. DMF was removed by distillation under vacuum and the product was extracted with ethyl acetate (100 ml) and washed with water three times to remove lithium bromide. The organic layer was then collected, dried with magnesium sulfate, and ethyl acetate was removed using a rotary evaporator. A dark viscous liquid bis(cyclic carbonate) furfuryl amine (BCCFA) was obtained with a 95% yield based on diglycidyl furfuryl amine.

<sup>1</sup>H NMR (400 MHz, Chloroform-d)  $\delta$  7.32 (d, J = 1.8 Hz, 1H), 6.27 (t, J = 2.5 Hz, 1H), 6.19 (d, J = 3.2 Hz, 1H), 4.70 (tt, J = 7.9, 5.1, 2.8 Hz, 2H), 4.42 (td, J = 8.4, 2.3 Hz, 2H), 4.05 (ddd, J = 8.7, 7.1, 5.6 Hz, 2H), 3.82 – 3.68 (m, 2H), 2.89 (q, J = 4.3, 3.3 Hz, 4H).

**Table S1** List of abbreviations used in this work.

| Chemical, Compound, Material                                       | Abbreviation |
|--------------------------------------------------------------------|--------------|
| 4,7,10-Trioxa-1,13-tridecanediamine                                | TTD          |
| Epichlorohydrin                                                    | ECH          |
| Tetrabutylammonium bromide                                         | TBAB         |
| Lithium bromide                                                    | LiBr         |
| 4,4-Bismaleimidodiphenylmethane                                    | BIM          |
| Poly(propylene glycol) bis(2-aminopropyl ether)                    | PEA          |
| <i>N,N</i> -Dimethylformamide                                      | DMF          |
| Furfuryl amine                                                     | FA           |
| Diglycidyl furfuryl amine                                          | DGFA         |
| Bis(cyclic carbonate) furfuryl amine                               | BCCFA        |
| Oligourea                                                          | OUa          |
| Polyurea                                                           | PUa          |
| Polyurethane-urea                                                  | PUUa         |
| Polyurethane-urea Diels-Alder adduct                               | PUUa-DA      |
| Poly(propylene glycol) bis(2-aminopropyl ether) Diels-Alder adduct | PEA-DA       |
| 4,7,10-Trioxa-1,13-tridecanediamine Diels-Alder adduct             | TTD-DA       |

**Table S2** Thermal properties determined by DSC, TGA.

| Entry | Sample <sup>a)</sup>  | DSC                         |                             |                          |                          | TGA                            |
|-------|-----------------------|-----------------------------|-----------------------------|--------------------------|--------------------------|--------------------------------|
|       |                       | $T_{m1}$ (°C) <sup>b)</sup> | $T_{m2}$ (°C) <sup>b)</sup> | $T_c$ (°C) <sup>b)</sup> | $T_g$ (°C) <sup>b)</sup> | $T_{d,5\%}$ (°C) <sup>c)</sup> |
| 1     | OUa                   | 79                          | 107                         | 55                       | -26                      | 221                            |
| 2     | PUa                   | 90                          | 116                         | 54                       | -20                      | 292                            |
| 3     | PUUa                  | 84                          | 102                         | --                       | -14                      | 225                            |
| 4     | PUUa-DA               | --                          | --                          | --                       | -8                       | 226                            |
| 5     | PUUa-DA <sup>d)</sup> | 66                          | 80                          | /                        | --                       | 226                            |
| 6     | TTD-DA                | /                           | /                           | /                        | /                        | 100                            |
| 7     | PEA-DA                | --                          | --                          | --                       | --                       | 273                            |

<sup>a)</sup> Heating/cooling/heating thermal cycles at 10 °C/min, values determined from second heating scans to eliminate heating history. The abbreviations are listed in Table S1 <sup>b)</sup>  $T_{m1}$  and  $T_{m2}$  are melting temperature and  $T_g$  is glass transition temperature, which are measured as the peak temperature in the endotherm.  $T_c$  is crystallization temperature measured as the peak temperature in the exotherm.

<sup>c)</sup>  $T_{d,5\%}$  is the initial decomposition temperature (the temperature of 5% weight loss). <sup>d)</sup> Values determined from first heating scans. -- Not detected, / Not tested.

**Table S3** Mechanical properties of polyurea (PUa), polyurethane urea (PUUa), polyurethane-urea Diels-Alder adduct (PUUa-DA) and poly(propylene glycol) bis(2-aminopropyl ether) Diels-Alder adduct (PEA-DA).

| Sample  | Tensile stress (MPa) | Elongation at break (%) | Young's modulus (MPa) |
|---------|----------------------|-------------------------|-----------------------|
| PUa     | 15.2 ± 1.0           | 3.4 ± 0.4               | 527 ± 57              |
| PUUa    | 15.9 ± 0.3           | 46 ± 8                  | 206 ± 8               |
| PUUa-DA | 18.5 ± 0.9           | 136 ± 20                | 151 ± 5               |
| PEA-DA  | 0.085 ± 0.015        | 58 ± 5                  | 0.21 ± 0.02           |

**Table S4** Mechanical properties and healing efficiency of polyurethane-urea Diels-Alder adduct (PUUa-DA) and healed PUUa-DA.

| Healed conditions           | Tensile stress (MPa) | Elongation at break (%) | Toughness (MJ/m <sup>3</sup> ) | Healing efficiency <sup>a)</sup> (%) |
|-----------------------------|----------------------|-------------------------|--------------------------------|--------------------------------------|
| Original specimen           | 18.5 ± 0.9           | 136 ± 20                | 21.1 ± 3.9                     | /                                    |
| 120 °C, 10 min; 60 °C, 24 h | 16.6 ± 0.3           | 140 ± 22                | 19.9 ± 2.5                     | 94                                   |
| 60 °C, 24 h                 | 11.7 ± 0.9           | 88 ± 14                 | 8.3 ± 1.7                      | 39                                   |
| 120 °C, 10 min              | 17.5 ± 0.3           | 27 ± 0.1                | 4.9 ± 0.1                      | 23                                   |

<sup>a)</sup> The healing efficiency was calculated by the ratio of the toughness of the healed specimen against the original one.

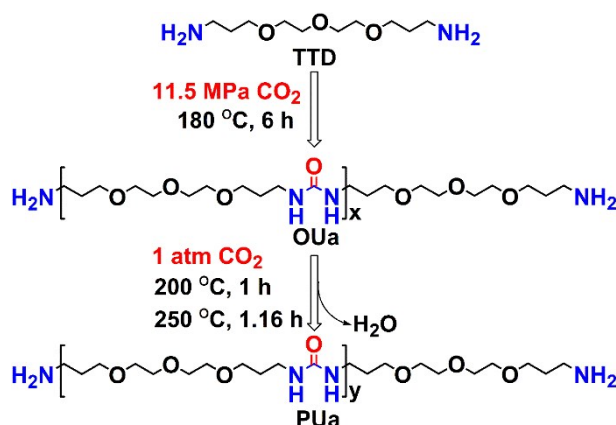

**Scheme S1** Synthesis of non-isocyanate oligourea (OUa) and polyurea (PUa) from CO<sub>2</sub>.

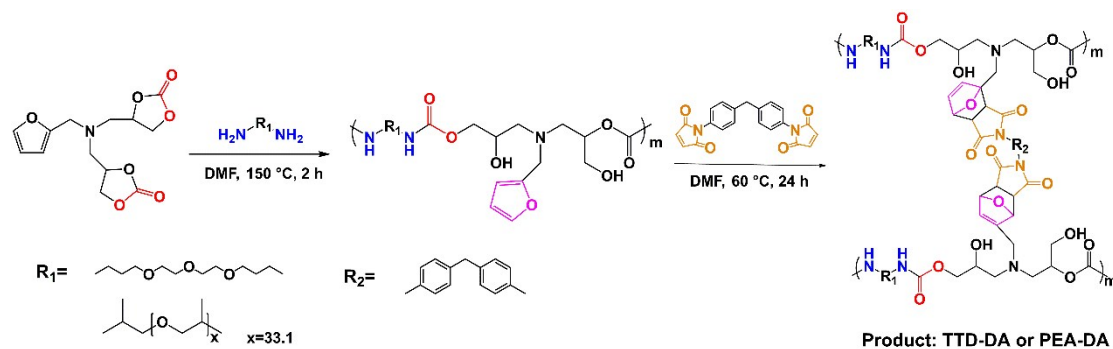

**Scheme S2** Synthesis of 4,7,10-Trioxa-1,13-tridecanediamine Diels-Alder adduct (TTD-DA) and poly(propylene glycol) bis(2-aminopropyl ether) Diels-Alder adduct (PEA-DA).

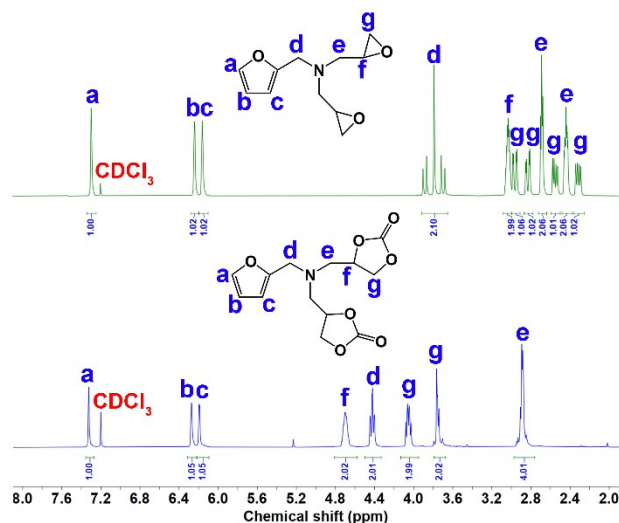

**Fig. S1**  $^1\text{H}$  NMR of diglycidyl furfuryl amine (DGFA) (top), bis(cyclic carbonate) furfuryl amine (BCCFA) (bottom).

The signals of protons between 2.3 and 3.1 ppm ascribed to DGFA oxirane groups indicated DGFA was produced from furfurylamine, these signals disappeared after reacting with  $\text{CO}_2$ , and the signals at 4.7, 4.1, and 3.7 ppm ascribed to cyclic carbonate group appeared. Moreover, a signal at 7.4 ppm characterized a position proton of the furan ring, and the ratio between integrations of *a* and *f* position protons was 1:2, confirming that the difunctional cyclic carbonate group belonging to BCCFA was formed and the purity was good.

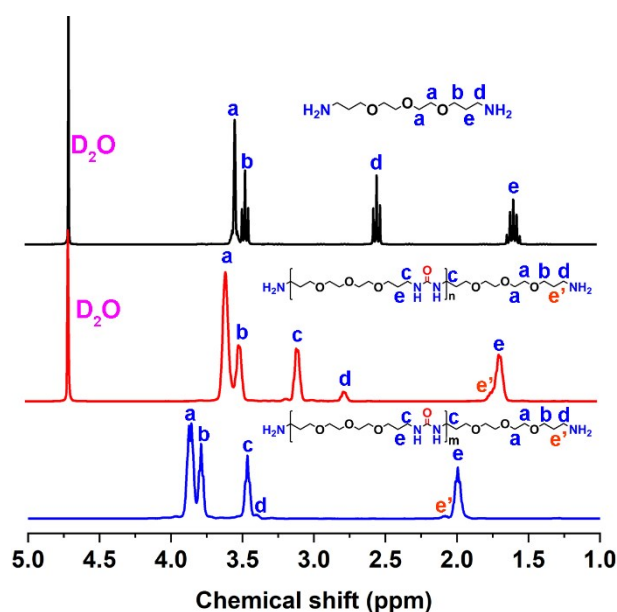

**Fig. S2**  $^1\text{H}$  NMR of 4,7,10-trioxa-1,13-tridecanediamine (top), oligourea (medium) and polyurea (bottom). 4,7,10-trioxa-1,13-tridecanediamine and oligourea were dissolved in  $\text{D}_2\text{O}$  and polyurea was dissolved in  $\text{TFA-}d$  for  $^1\text{H}$  NMR measurement.

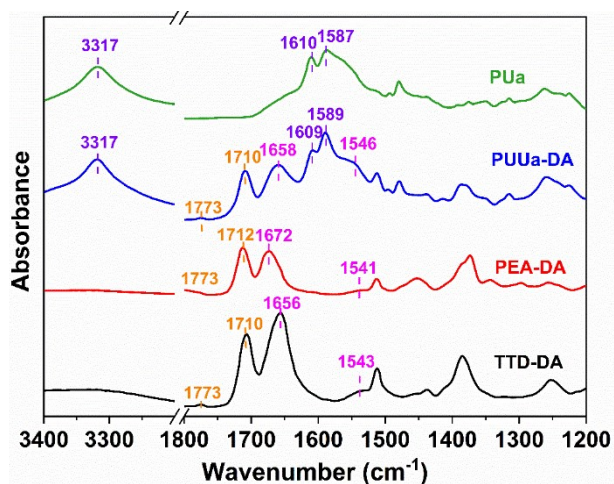

**Fig. S3** FTIR spectra of polyurea (PUa), polyurethane-urea Diels-Alder adduct (PUUa-DA), poly(propylene glycol) bis(2-aminopropyl ether) Diels-Alder adduct (PEA-DA) and 4,7,10-Trioxa-1,13-tridecanediamine Diels-Alder adduct (TTD-DA).

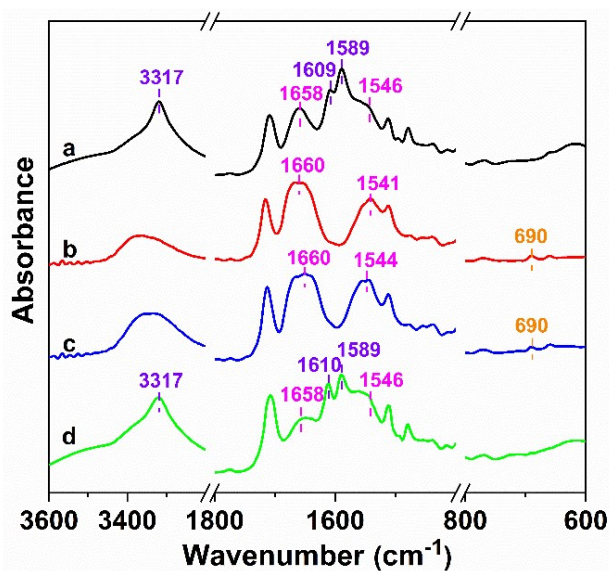

**Fig. S4** FTIR spectra of polyurethane-urea Diels-Alder adduct (PUUa-DA) (a) at 30 °C, (b) heating up to 120 °C, (c) cooling down to 30 °C and (d) cooling down to 30 °C and then staying at 30 °C for 24 h.

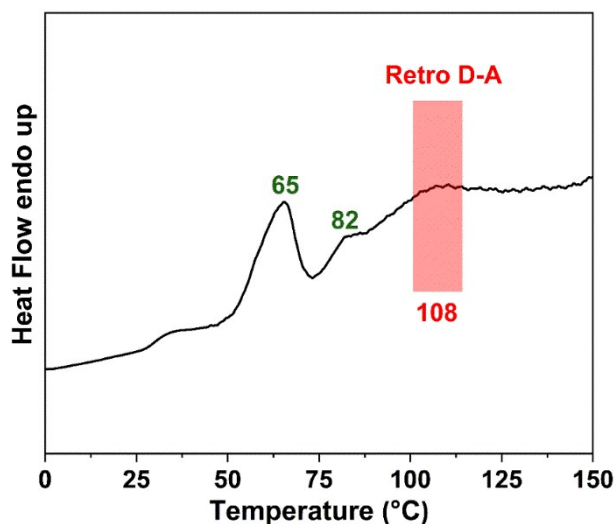

**Fig. S5** DSC curve of polyurethane-urea Diels-Alder adduct (PUUa-DA) from first heating scan.

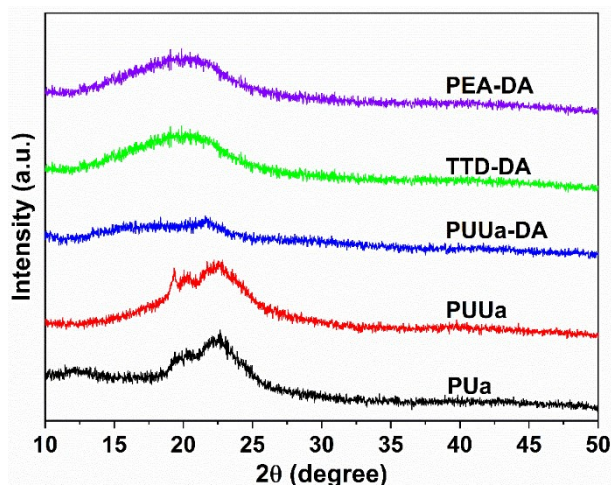

**Fig. S6** XRD curves of polyurea (PUa), polyurethane-urea (PUUa), polyurethane-urea Diels-Alder adduct (PUUa-DA), 4,7,10-Trioxa-1,13-tridecanediamine Diels-Alder adduct (TTD-DA) and poly(propylene glycol) bis(2-aminopropyl ether) Diels-Alder adduct (PEA-DA).

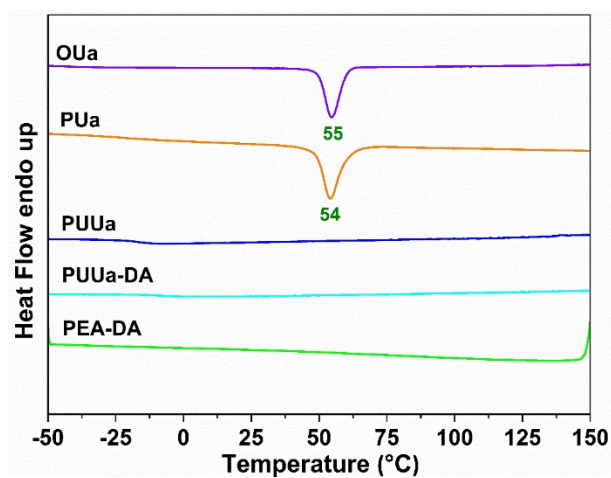

**Fig. S7** DSC curves of oligourea (OUa), polyurea (PUa), polyurethane-urea (PUUa), polyurethane-urea Diels-Alder adduct (PUUa-DA) and poly(propylene glycol) bis(2-aminopropyl ether) Diels-Alder adduct (PEA-DA) from cooling scan.

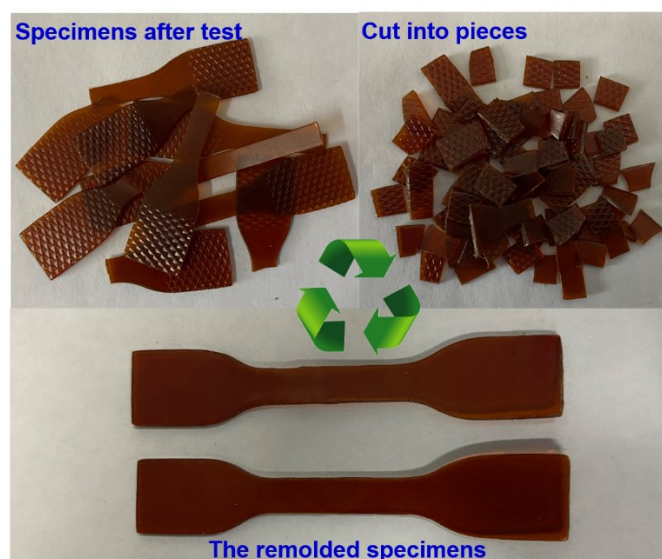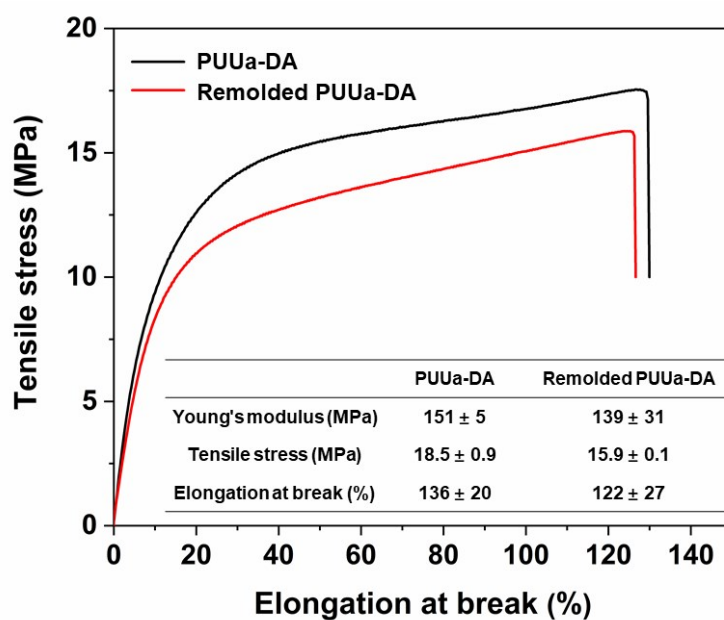

**Fig. S8** Recyclability of polyurethane-urea Diels-Alder adduct (PUUa-DA) through the hot-press molding.

## Reference

- 1 E. Dolci, V. Froidevaux, G. Michaud, F. Simon, R. Auvergne, S. Fouquay and S. Caillol, J. Appl. Polym. Sci., 2017, **134**, 44408.
